# Supplementary material for: Strain effect on photocatalytic oxygen evolution activity in Sr 3 NF 3 mixed anion perovskite using first-principles density functional theory (DFT)
Source: Royal Society of Chemistry journal article supplement (doi:10.1039/d5ra08652c), 2026-01-01
Supplement: d5ra08652c1.pdf [file d5ra08652c1.pdf]

# **Strain Effect on Photocatalytic Oxygen Evolution Activity in $\text{Sr}_3\text{NF}_3$ Mixed Anion Perovskite Using First-principles Density Functional Theory (DFT)**

## **Supplementary Information**

Parmith Utsho <sup>a</sup>, Manik Ibrahim <sup>b</sup>, Md. Sakib Hasan Khan <sup>\*a</sup> and Md. Rafiqul Islam <sup>a</sup>

<sup>a</sup>Department of Electrical and Electronic Engineering, Khulna University of Engineering & Technology, Khulna-9203, Bangladesh.

E-mail: sakib@eee.kuet.ac.bd

<sup>b</sup>Department of Energy Science and Engineering, Khulna University of Engineering & Technology, Khulna-9203, Bangladesh.

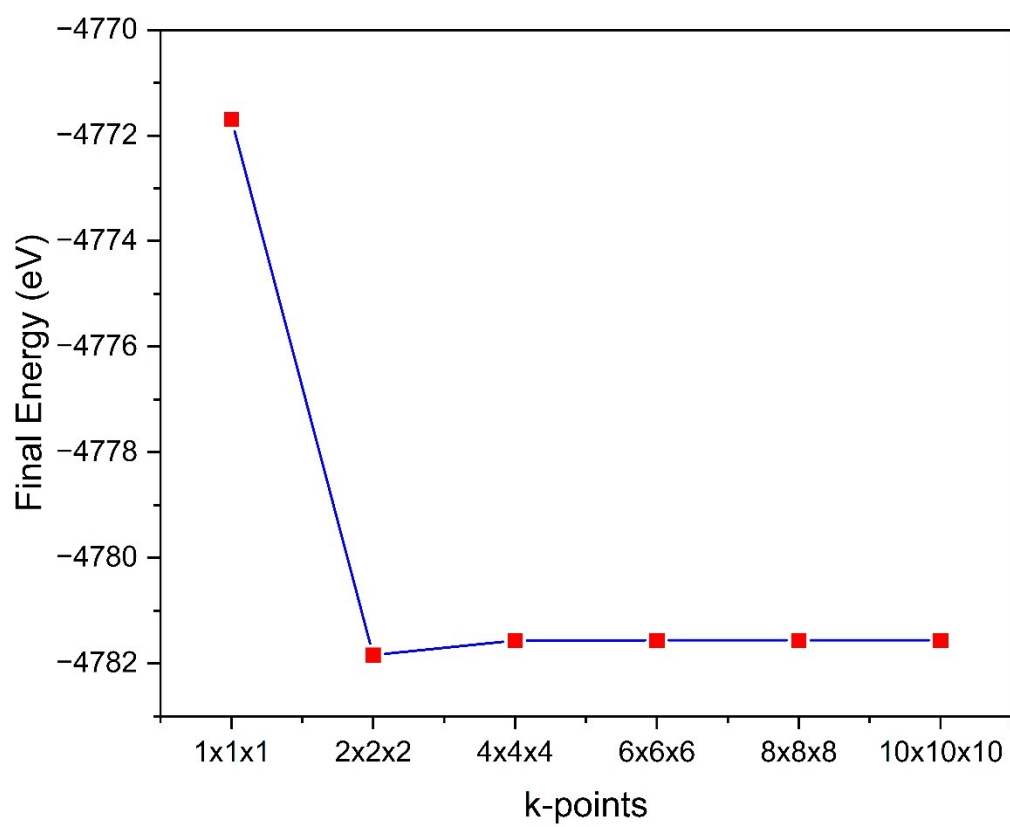

**Figure S1:** Convergence of total energy with respect to Monkhorst–Pack k-point mesh for  $\text{Sr}_3\text{NF}_3$  calculated using the GGA-PBE functional.

**Table S1:** Comparison of experimental bandgaps ( $E_g^{\text{Exp}}$ ) with theoretical values calculated using PBE ( $E_g^{\text{PBE}}$ ) and HSE06 ( $E_g^{\text{HSE06}}$ ) functionals for various perovskite materials<sup>1</sup>

| Material            | $E_g^{\text{Exp}}$<br>(eV) | $E_g^{\text{HSE06}}$<br>(eV) | $E_g^{\text{PBE}}$<br>(eV) |
|---------------------|----------------------------|------------------------------|----------------------------|
| CsPbCl <sub>3</sub> | 3.09                       | 3.23                         | 2.32                       |
| CsSnI <sub>3</sub>  | 1.23                       | 1.15                         | 0.95                       |
| CsGeBr <sub>3</sub> | 2.15                       | 1.97                         | 1.35                       |
| CsGeI <sub>3</sub>  | 1.67                       | 1.61                         | 1.12                       |
| MAGeBr <sub>3</sub> | 2.55                       | 2.5                          | 1.27                       |

MA = CH<sub>3</sub>NH<sub>3</sub><sup>+</sup>

**Table S2:** Comparison of visible-light absorption coefficients of  $\text{Sr}_3\text{NF}_3$  and representative photocatalysts reported in the literature.

| Material                 | Absorption coefficient<br>( $\text{cm}^{-1}$ ) | Wavelength (nm) | Reference    |
|--------------------------|------------------------------------------------|-----------------|--------------|
| $\text{BiVO}_4$          | $3 \times 10^4$                                | 400             | <sup>2</sup> |
| $\text{g-C}_3\text{N}_4$ | $\sim 10^4$                                    | 400-500         | <sup>3</sup> |
| $\text{SrTaO}_2\text{N}$ | $3 \times 10^4$                                | 320             | <sup>4</sup> |
| $\text{Sr}_3\text{NF}_3$ | $3.7 \times 10^4$                              | 320             | This work    |

The reported absorption coefficients correspond to representative values in the visible region reported in the literature. Although the exact wavelength ranges differ slightly among materials, the comparison demonstrates that  $\text{Sr}_3\text{NF}_3$  exhibits absorption coefficients comparable to established OER photocatalysts.

## References:

- 1 T. Das, G. Di Liberto and G. Pacchioni, *Journal of Physical Chemistry C*, 2022, **126**, 2184–2198.
- 2 J. Yang, D. Wang, X. Zhou and C. Li, *Chemistry - A European Journal*, 2013, **19**, 1320–1326.
- 3 H. Fan, X. Ma, X. Li, L. Yang, Y. Bian and W. Li, *Molecules*, 2022, **27**, 8336.
- 4 G. M. Khatamunnaby, M. S. Hasan Khan, M. T. Hasan, M. R. Islam and M. Z. Rahman, *AIP Adv.*, 2024, **14**, 025147.
